# Supplementary material for: Biases in grant proposal success rates, funding rates and award sizes affect the geographical distribution of funding for biomedical research
Source: PeerJ. 2016 Apr 11;4:e1917. doi: 10.7717/peerj.1917 (PMC4830231; doi:10.7717/peerj.1917)
Supplement: Data S1 — Table S1. Summary of research project grant characteristics by location. Table S2. Per capita funding of research project grants by location. Table S3. Average sizes of research project grants by location. Table S4. Funding rates of research project grants by location. Table S5. Success rates of research project grants by location. Table S6. Productivity values of research project grants by location. [file peerj-04-1917-s001.xlsx]

## Sheet: SUMMARY
State	Per Capita Funding Rank	Per Capita Funding	Investigator Funding Rate	Application Success Rate	Average Award Size	Productivity Index
Alabama	24	35.6102	0.2307	0.1794	359909	14.2829
Alaska	50	4.94407	0.1712	0.135	372579	6.83552
Arizona	35	22.0043	0.1997	0.1577	361054	13.7317
Arkansas	42	16.3605	0.1886	0.1459	326870	11.3491
California	11	67.9052	0.2961	0.2277	415976	12.2874
Colorado	19	48.8719	0.2616	0.21	348518	13.8433
Connecticut	4	103.585	0.3074	0.2377	391702	11.9651
Delaware	40	19.0365	0.1545	0.1314	297702	13.7628
District Of Columbia	2	233.105	0.2049	0.1533	479516	10.4137
Florida	41	17.5881	0.2029	0.1539	354483	12.0812
Georgia	26	32.5888	0.238	0.1804	362866	12.6671
Hawaii	33	24.5905	0.1736	0.1593	465512	13.1279
Idaho	51	2.35994	0.1252	0.1103	253020	15.3535
Illinois	23	44.4372	0.2549	0.2012	360215	15.0118
Indiana	32	26.7258	0.2329	0.1822	320669	17.4035
Iowa	18	50.9949	0.2276	0.1849	390579	13.6678
Kansas	36	20.9367	0.1992	0.1595	293676	16.1433
Kentucky	30	27.8411	0.2135	0.1585	313324	14.5647
Louisiana	38	19.8011	0.1722	0.1328	313050	14.4186
Maine	31	26.8492	0.2732	0.2412	373601	11.2166
Maryland	3	135.865	0.2721	0.2155	446718	10.9056
Massachusetts	1	283	0.3092	0.2392	452898	11.5249
Michigan	20	46.889	0.2456	0.197	367791	13.9858
Minnesota	12	67.6134	0.2789	0.226	402048	15.8842
Mississippi	46	7.27879	0.1498	0.1283	345197	22.5739
Missouri	15	54.6209	0.2747	0.2175	357749	15.5872
Montana	39	19.6995	0.2222	0.178	295749	8.69858
Nebraska	25	34.6377	0.2019	0.1593	314095	16.3471
Nevada	49	4.99293	0.1629	0.1466	305711	11.6838
New Hampshire	14	57.8509	0.2797	0.2351	395130	14.1667
New Jersey	34	22.3212	0.2267	0.1778	338352	13.165
New Mexico	28	30.7719	0.2188	0.1784	350299	11.7429
New York	8	81.2242	0.2713	0.2146	399952	12.1923
North Carolina	9	79.1247	0.2747	0.2183	435685	11.8736
North Dakota	44	9.72953	0.1387	0.1004	246575	15.2075
Ohio	22	45.2059	0.2369	0.185	356533	12.416
Oklahoma	43	15.0946	0.1842	0.1444	334098	13.4578
Oregon	13	58.9933	0.2779	0.2279	366980	11.265
Pennsylvania	7	84.9971	0.2772	0.2132	383598	12.7594
Puerto Rico	52	2.29587	0.0907	0.0782	422163	7.81458
Rhode Island	5	101.952	0.2431	0.1878	379707	10.728
South Carolina	37	20.5293	0.1949	0.1573	297044	14.2971
South Dakota	45	9.25872	0.1505	0.1144	327658	24.9935
Tennessee	16	52.0818	0.2703	0.213	377912	15.2953
Texas	27	32.5049	0.2261	0.1747	349733	14.4749
Utah	21	46.6437	0.2722	0.2269	345244	13.086
Vermont	10	75.237	0.2518	0.2028	385420	15.0258
Virginia	29	29.6929	0.2272	0.1772	354051	13.3063
Washington	6	96.6456	0.3081	0.2435	495878	9.74727
West Virginia	47	7.03316	0.1224	0.1033	249987	16.3855
Wisconsin	17	51.3057	0.2823	0.2292	366232	13.8482
Wyoming	48	5.40069	0.1446	0.1307	225253	7.33467

## Sheet: Per Capita Funding
		2004			2005			2006			2007			2008			2009			2010			2011			2012			2013		mean
State	Funding	Population	Per Capita Funding	Funding	Population	Per Capita Funding	Funding	Population	Per Capita Funding	Funding	Population	Per Capita Funding	Funding	Population	Per Capita Funding	Funding	Population	Per Capita Funding	Funding	Population	Per Capita Funding	Funding	Population	Per Capita Funding	Funding	Population	Per Capita Funding	Funding	Population	Per Capita Funding	Per Capita Funding	Per Capita Funding Rank
Alabama	175040965	4530729	38.6342	172537781	4569805	37.756	162763221	4628981	35.1618	162286802	4672840	34.7298	155905081	4718206	33.0433	200679695	4757938	42.1779	191821920	4785570	40.0834	151816877	4801627	31.6178	161751214	4817528	33.5756	141737859	4833722	29.3227	35.6102	24
Alaska	2405009	659286	3.6479	3606575	666946	5.4076	1472524	675302	2.18054	2379455	680300	3.49766	3580605	687455	5.20849	5067341	698895	7.2505	5373255	713868	7.52696	4121349	723375	5.69739	3704288	730307	5.07223	2904784	735132	3.95138	4.94407	50
Arizona	123203276	5652404	21.7966	136815267	5839077	23.431	128584893	6029141	21.3272	133194961	6167681	21.5956	126148963	6280362	20.0863	151783512	6343154	23.9287	150892777	6408790	23.5447	132988920	6468796	20.5585	138314658	6551149	21.113	150169780	6626624	22.6616	22.0043	35		PCF Quartile	Average PCF
Arkansas	44283677	2749686	16.105	47906767	2781097	17.2259	48716086	2821761	17.2644	47709400	2848650	16.7481	45499460	2874554	15.8284	61634097	2896843	21.2763	60765900	2922280	20.794	45044896	2938506	15.3292	37714795	2949828	12.7854	30327570	2959373	10.248	16.3605	42		Q1	113.019
California	2267030493	35574576	63.7261	2345704560	35827943	65.4714	2334306945	36021202	64.8037	2327841294	36250311	64.2158	2324321430	36604337	63.4985	2930684426	36961229	79.2908	3001754941	37333601	80.4036	2502026711	37668681	66.4219	2542630685	37999878	66.9115	2465122719	38332521	64.3089	67.9052	11		Q2	46.2876
Colorado	237393789	4575013	51.8892	231925461	4631888	50.0715	224597658	4720423	47.58	233680487	4803868	48.6442	241531038	4889730	49.3956	284577685	4972195	57.2338	270845507	5048196	53.6519	230660831	5118400	45.065	218910187	5189458	42.1836	226563454	5268367	43.0045	48.8719	19		Q3	24.9437
Connecticut	331842121	3496094	94.918	342316021	3506956	97.6106	341178215	3517460	96.9956	353892022	3527270	100.33	350678122	3545579	98.9057	420273072	3561807	117.994	440804026	3579210	123.157	375077725	3588948	104.509	376549748	3591765	104.837	347357106	3596080	96.5933	103.585	4		Q4	9.33642
Delaware	16149275	830803	19.4382	14438422	845150	17.0839	17125743	859268	19.9306	16921142	871749	19.4106	17569975	883874	19.8784	20312071	891730	22.7783	18149863	899711	20.173	16925813	907985	18.6411	17592686	917053	19.1839	12819283	925749	13.8475	19.0365	40
District Of Columbia	126545230	567754	222.887	137183236	567136	241.888	124492392	570681	218.147	155488253	574404	270.695	150203541	580236	258.866	167746208	592228	283.246	153530493	605125	253.717	123144628	619624	198.741	122351771	633427	193.158	122634775	646449	189.705	233.105	2
Florida	267304448	17415318	15.3488	291234152	17842038	16.3229	267305991	18166990	14.7138	275157323	18367842	14.9804	279440523	18527305	15.0826	371080884	18652644	19.8943	385968376	18846054	20.4801	395125231	19083482	20.7051	400575898	19320749	20.7329	344523324	19552860	17.6201	17.5881	41
Georgia	267697771	8769252	30.5269	267914486	8925922	30.0153	260759046	9155813	28.4802	262692126	9349988	28.0955	283345458	9504843	29.8106	378516988	9620846	39.3434	402373104	9713248	41.4252	340083632	9810181	34.6664	326449572	9915646	32.9227	305775937	9992167	30.6016	32.5888	26
Hawaii	39649550	1273569	31.1326	29912829	1292729	23.1393	30794530	1309731	23.5121	31818816	1315675	24.1844	37435611	1332213	28.1003	42779098	1346717	31.7655	34504057	1363731	25.3012	28731087	1376897	20.8665	30287462	1390090	21.7881	22626711	1404054	16.1153	24.5905	33
Idaho	2959419	1391802	2.12632	4106007	1428241	2.87487	3340504	1468669	2.27451	3677751	1505105	2.44352	2619751	1534320	1.70743	4198350	1554439	2.70088	4199651	1570718	2.67371	3467252	1583930	2.18902	4053237	1595590	2.54027	3335353	1612136	2.0689	2.35994	51
Illinois	502971400	12589773	39.9508	538186467	12609903	42.6797	537974787	12643955	42.548	552263795	12695866	43.4995	545375587	12747038	42.7845	675607001	12796778	52.7951	649799334	12839695	50.6086	555679208	12855970	43.2234	572911460	12868192	44.5215	537965232	12882135	41.7606	44.4372	23
Indiana	155021282	6233007	24.871	166027820	6278616	26.4434	166581087	6332669	26.305	169672800	6379599	26.5962	162239791	6424806	25.2521	206122173	6459325	31.9108	205548565	6489965	31.6718	171479999	6516336	26.3154	164192065	6537782	25.1143	149669484	6570902	22.7776	26.7258	32
Iowa	150611549	2953635	50.9919	142815512	2964454	48.176	145350061	2982644	48.732	147270825	2999212	49.1032	153228769	3016734	50.7929	185641756	3032870	61.2099	185262873	3050314	60.7357	151075662	3064102	49.305	150742053	3075039	49.0212	129428808	3090416	41.8807	50.9949	18
Kansas	45745934	2734373	16.73	46855288	2745299	17.0675	50772048	2762931	18.3762	55944587	2783785	20.0966	60970841	2808076	21.7127	73142866	2832704	25.8209	77124496	2858910	26.9769	64788864	2869548	22.5781	60808204	2885398	21.0745	54793144	2893957	18.9336	20.9367	36
Kentucky	106239698	4146101	25.624	114595621	4182742	27.3972	113540812	4219239	26.9103	113274400	4256672	26.611	117360153	4289878	27.3575	154825515	4317074	35.8635	136242745	4347698	31.3368	115445893	4366869	26.4368	116451347	4379730	26.5887	106741258	4395295	24.2853	27.8411	30
Louisiana	92718247	4552238	20.3676	102693504	4576628	22.4387	97739480	4302665	22.716	85752641	4375581	19.598	80730241	4435586	18.2006	89819560	4491648	19.997	92598803	4545392	20.372	83485613	4575197	18.2474	86111134	4602134	18.7111	80310866	4625470	17.3627	19.8011	38
Maine	41698754	1313688	31.7417	37599978	1318787	28.511	37835663	1323619	28.585	34846045	1327040	26.2585	30797700	1330509	23.1473	41763472	1329590	31.4108	39507739	1327366	29.764	32208429	1327844	24.2562	32659358	1328501	24.5836	26876763	1328302	20.2339	26.8492	31
Maryland	764350838	5546935	137.797	768610105	5592379	137.439	753314047	5627367	133.866	727897901	5653408	128.754	736491102	5684965	129.551	916764886	5730388	159.983	901269597	5787193	155.735	792144731	5840241	135.636	740318387	5884868	125.8	676385259	5928814	114.084	135.865	3
Massachusetts	1612727014	6412281	251.506	1671413027	6403290	261.024	1678781245	6410084	261.897	1730201870	6431559	269.017	1721519558	6468967	266.12	2230062419	6517613	342.159	2276982705	6563263	346.928	1863402530	6606285	282.065	1895060689	6645303	285.173	1767657107	6692824	264.112	283	1
Michigan	392976384	10055315	39.0815	411698600	10051137	40.9604	411845889	10036081	41.0365	419646459	10001284	41.9593	436821397	9946889	43.9154	578631353	9901591	58.4382	574895733	9876149	58.2105	501548865	9874589	50.7919	486728654	9882519	49.2515	447722745	9895622	45.2445	46.889	20
Minnesota	306819030	5087713	60.3059	315019835	5119598	61.5321	319354386	5163555	61.8478	346830178	5207203	66.6058	347544323	5247018	66.2365	398847352	5281203	75.5221	427680363	5310337	80.5373	359541017	5347108	67.2403	365875348	5379646	68.011	370186822	5420380	68.2954	67.6134	12
Mississippi	20733156	2889010	7.17656	17930487	2905943	6.17028	21528649	2904978	7.41095	20426055	2928350	6.97528	19356030	2947806	6.56625	21702874	2958774	7.33509	23322974	2970047	7.85273	22026294	2977886	7.39662	22006185	2986450	7.36868	25531324	2991207	8.53546	7.27879	46
Missouri	333804297	5747741	58.0757	326806655	5790300	56.4404	315945966	5842704	54.0753	302109715	5887612	51.3128	321745514	5923916	54.313	379978145	5961088	63.7431	374162985	5996063	62.4014	301231477	6010065	50.1212	303705516	6024522	50.4116	273889431	6044171	45.3146	54.6209	15
Montana	17841467	930009	19.1842	26137011	940102	27.8023	17428972	952692	18.2944	19725569	964706	20.4472	20562501	976415	21.0592	25308054	983982	25.72	22372633	990527	22.5866	17326472	997600	17.3682	13145836	1005494	13.074	11632986	1015165	11.4592	19.6995	39
Nebraska	52414856	1749370	29.9621	55363308	1761497	31.4297	57800273	1772693	32.6059	53819433	1783440	30.1773	61544696	1796378	34.2604	81503972	1812683	44.9632	80328588	1829838	43.8993	60415359	1841749	32.8033	63836128	1855350	34.4065	59548481	1868516	31.8694	34.6377	25
Nevada	13770101	2346222	5.86905	12688169	2432143	5.21687	12999317	2522658	5.15302	12952359	2601072	4.97962	13397365	2653630	5.04869	15224739	2684665	5.671	14281840	2703230	5.28325	12240598	2717951	4.50361	11443240	2754354	4.1546	11298903	2790136	4.04959	4.99293	49
New Hampshire	81767256	1290121	63.3795	82360671	1298492	63.4279	78395702	1308389	59.9177	76324732	1312540	58.1504	72183159	1315906	54.8543	90371418	1316102	68.666	77183537	1316614	58.6228	66060907	1318075	50.1192	67486247	1321617	51.0634	66580419	1323459	50.3079	57.8509	14
New Jersey	204837755	8634561	23.723	201896669	8651974	23.3353	188555977	8661679	21.769	196298809	8677885	22.6206	186262258	8711090	21.3822	224255746	8755602	25.6128	221881490	8802707	25.2061	183483615	8836639	20.764	178606504	8867749	20.1411	166045836	8899339	18.6582	22.3212	34
New Mexico	53213117	1903808	27.9509	53990955	1932274	27.9417	52927894	1962137	26.9746	64873647	1990070	32.5987	65620380	2010662	32.6362	80041159	2036802	39.2975	77211991	2064982	37.3911	56337105	2077919	27.1123	61527332	2083540	29.5302	54814437	2085287	26.2863	30.7719	28
New York	1496931713	19171567	78.0808	1509126384	19132610	78.8772	1463040582	19104631	76.5804	1507538450	19132335	78.7953	1462034144	19212436	76.0983	1812689360	19307066	93.8874	1836686883	19398228	94.6832	1525689910	19502728	78.2296	1576093416	19576125	80.511	1503284280	19651127	76.4986	81.2242	8
North Carolina	636895531	8553152	74.4633	681293114	8705407	78.2609	694004142	8917270	77.827	696908699	9118037	76.4319	697635901	9309449	74.9385	876555871	9449566	92.7615	843037245	9559533	88.1881	742907311	9651377	76.9742	765881142	9748364	78.5651	717294354	9848060	72.8361	79.1247	9
North Dakota	6729746	644705	10.4385	7271187	646089	11.2542	6374078	649422	9.815	7468927	652822	11.441	5591721	657569	8.50363	7222853	664968	10.862	6514038	674344	9.65981	6860111	684867	10.0167	5647315	701345	8.05212	5246347	723393	7.25242	9.72953	44
Ohio	466882225	11452251	40.7677	500554986	11463320	43.6658	493924754	11481213	43.0203	487493513	11500468	42.389	486509858	11515391	42.2487	608304311	11528896	52.7634	617917283	11545435	53.5205	511974503	11549772	44.3277	529533740	11553031	45.835	503566820	11570808	43.5205	45.2059	22
Oklahoma	46562890	3525233	13.2085	47256152	3548597	13.3169	45843655	3594090	12.7553	51794824	3634349	14.2515	47991724	3668976	13.0804	71918387	3717572	19.3455	72849739	3759263	19.3787	60437185	3785534	15.9653	57689414	3815780	15.1186	55931882	3850568	14.5256	15.0946	43
Oregon	203555342	3569463	57.0269	221101346	3613202	61.1926	216674033	3670883	59.025	212539002	3722417	57.097	205575450	3768748	54.5474	244050746	3808600	64.0789	259084849	3837208	67.5191	232869598	3867937	60.2051	223139882	3899801	57.2183	204451565	3930065	52.0224	58.9933	13
Pennsylvania	989158656	12410722	79.7019	1019719402	12449990	81.9052	1004133550	12510809	80.2613	1002267866	12563937	79.7734	1015132324	12612285	80.4876	1285924955	12666858	101.519	1272838163	12710472	100.141	1082759797	12741310	84.9803	1074197605	12764475	84.1553	984178446	12773801	77.0466	84.9971	7
Puerto Rico	8403383	3826878	2.19588	8159225	3821362	2.13516	6754441	3805214	1.77505	5676013	3782995	1.5004	7564584	3760866	2.01139	9434767	3740410	2.52239	11366756	3721208	3.05459	9689648	3686580	2.62836	9082156	3651545	2.48721	9573764	3615086	2.64828	2.29587	52
Rhode Island	96543700	1074579	89.8433	97348348	1067916	91.1573	95883780	1063096	90.193	105290430	1057315	99.5828	100543648	1055003	95.3018	131392837	1053646	124.703	124236079	1052669	118.02	114576495	1050350	109.084	109812633	1050304	104.553	102086266	1051511	97.0853	101.952	5
South Carolina	80663226	4210921	19.1557	80751625	4270150	18.9107	77010638	4357847	17.6717	89662275	4444110	20.1755	93611519	4528996	20.6694	127776349	4589872	27.8388	115878657	4636361	24.9935	93764225	4673509	20.0629	91726834	4723417	19.4196	78282265	4774839	16.3947	20.5293	37
South Dakota	8258798	770396	10.7202	8022556	775493	10.3451	7673047	783033	9.79914	6467529	791623	8.16996	5911864	799124	7.39793	8634285	807067	10.6983	9039094	816211	11.0745	6914558	823772	8.39378	6748321	834047	8.09106	6672158	844877	7.89719	9.25872	45
Tennessee	280151897	5910809	47.3965	305417314	5991057	50.9789	299269661	6088766	49.1511	306260313	6175727	49.591	305717278	6247411	48.935	402700312	6306019	63.8597	389060665	6356683	61.205	325228161	6398361	50.8299	328020628	6454914	50.8172	312157168	6495978	48.0539	52.0818	16
Texas	786983375	22394023	35.1426	788133183	22778123	34.6004	762036636	23359580	32.622	769532043	23831983	32.2899	768518174	24309039	31.6145	943537206	24801761	38.0432	938049168	25245178	37.1576	743232685	25640909	28.9862	750965968	26060796	28.8159	681757212	26448193	25.7771	32.5049	27
Utah	109415217	2401580	45.5597	112366884	2457719	45.72	113123314	2525507	44.7923	111648232	2597746	42.9789	113734578	2663029	42.7087	149893427	2723421	55.0387	152987125	2774424	55.1419	130460224	2814784	46.3482	130067066	2854871	45.5597	123545569	2900872	42.5891	46.6437	21
Vermont	53947398	619920	87.0232	51541700	621215	82.9692	46254733	622892	74.258	48730128	623481	78.1582	48756129	624151	78.1159	52545144	624817	84.0969	55727240	625793	89.0506	37925207	626320	60.5524	37618874	625953	60.0986	36374081	626630	58.0471	75.237	10
Virginia	237558341	7475575	31.7779	229139937	7577105	30.2411	223022751	7673725	29.0632	225791145	7751000	29.1306	226403641	7833496	28.902	298877944	7925937	37.7088	257984481	8024417	32.1499	219367662	8105850	27.0629	210516608	8186628	25.7147	207981341	8260405	25.1781	29.6929	29
Washington	542671760	6178645	87.8302	571643156	6257305	91.3561	623585945	6370753	97.8826	594206293	6461587	91.9598	585211008	6562231	89.1787	750606977	6667426	112.578	802870573	6742256	119.08	653464170	6821481	95.7951	658393912	6895318	95.4842	594736477	6971406	85.3108	96.6456	6
West Virginia	9527101	1816438	5.24494	10392592	1820492	5.70867	12850931	1827912	7.03039	15458195	1834052	8.42844	14340336	1840310	7.79235	18357913	1847775	9.93515	16031267	1854146	8.64617	12180666	1855184	6.56575	9871070	1856680	5.31652	10501308	1854304	5.66321	7.03316	47
Wisconsin	262133899	5514026	47.5395	270521253	5546166	48.7763	278281512	5577655	49.8922	283692929	5610775	50.5622	280678914	5640996	49.757	336957759	5669264	59.4359	347877363	5689060	61.1485	283016688	5708785	49.5756	280202363	5724554	48.9475	272333359	5742713	47.4224	51.3057	17
Wyoming	3364493	509106	6.60863	3401969	514157	6.6166	2265703	522667	4.33489	2595607	534876	4.85273	3189884	546043	5.84182	3756500	559851	6.70982	2615974	564222	4.63643	2043742	567329	3.60239	2587544	576626	4.48739	3680202	582658	6.31623	5.40069	48
Nation	15178105849	296632176	51.1681	15641453559	299337961	52.2535	15476117889	302185126	51.214	15667894065	305014202	51.3678	15646683602	307854832	50.8249	19650085790	310511939	63.2829	19711295503	313047503	62.9658	16554500136	315269144	52.5091	16632298379	317525230	52.381	15606612824	319743925	48.8097	53.6777

## Sheet: Award Size
			2004			2005			2006			2007			2008			2009			2010			2011			2012			2013		mean
State	Per Capita Funding Rank	Funding	Number of Awards	Average Award Size	Funding	Number of Awards	Average Award Size	Funding	Number of Awards	Average Award Size	Funding	Number of Awards	Average Award Size	Funding	Number of Awards	Average Award Size	Funding	Number of Awards	Average Award Size	Funding	Number of Awards	Average Award Size	Funding	Number of Awards	Average Award Size	Funding	Number of Awards	Average Award Size	Funding	Number of Awards	Average Award Size	Average Award Size
Alabama	24	175040965	518	337917	172537781	463	372652	162763221	457	356156	162286802	469	346027	155905081	449	347227	200679695	561	357718	191821920	513	373922	151816877	423	358905	161751214	416	388825	141737859	394	359741	359909
Alaska	50	2405009	4	601252	3606575	11	327870	1472524	8	184066	2379455	6	396576	3580605	12	298384	5067341	13	389795	5373255	11	488478	4121349	10	412135	3704288	11	336753	2904784	10	290478	372579
Arizona	35	123203276	382	322522	136815267	399	342895	128584893	383	335731	133194961	392	339783	126148963	367	343730	151783512	445	341087	150892777	408	369835	132988920	363	366361	138314658	341	405615	150169780	339	442979	361054		PCF Quartile	Average AS
Arkansas	42	44283677	135	328027	47906767	143	335012	48716086	141	345504	47709400	143	333632	45499460	138	329706	61634097	202	305119	60765900	174	349229	45044896	145	310654	37714795	117	322349	30327570	98	309465	326870		Q1	418160
California	11	2267030493	5866	386470	2345704560	5837	401868	2334306945	5738	406815	2327841294	5783	402532	2324321430	5709	407133	2930684426	7065	414817	3001754941	6661	450646	2502026711	5772	433477	2542630685	5864	433600	2465122719	5836	422399	415976		Q2	361752
Colorado	19	237393789	728	326090	231925461	709	327116	224597658	663	338760	233680487	675	346193	241531038	678	356240	284577685	817	348320	270845507	744	364040	230660831	632	364970	218910187	629	348029	226563454	620	365425	348518		Q3	340470
Connecticut	4	331842121	928	357588	342316021	915	374116	341178215	921	370443	353892022	916	386345	350678122	907	386635	420273072	1099	382414	440804026	1036	425487	375077725	893	420020	376549748	910	413791	347357106	868	400181	391702		Q4	312407
Delaware	40	16149275	67	241034	14438422	54	267378	17125743	59	290267	16921142	59	286799	17569975	56	313750	20312071	70	290172	18149863	59	307625	16925813	53	319355	17592686	53	331937	12819283	39	328700	297702
District Of Columbia	2	126545230	326	388176	137183236	306	448311	124492392	305	408172	155488253	279	557306	150203541	279	538364	167746208	335	500735	153530493	318	482800	123144628	243	506768	122351771	253	483604	122634775	255	480921	479516
Florida	41	267304448	821	325584	291234152	868	335523	267305991	862	310100	275157323	858	320696	279440523	849	329141	371080884	1062	349417	385968376	1055	365847	395125231	915	431831	400575898	972	412115	344523324	945	364575	354483
Georgia	26	267697771	823	325271	267914486	793	337849	260759046	774	336898	262692126	786	334214	283345458	823	344284	378516988	1044	362564	402373104	993	405210	340083632	833	408264	326449572	830	393313	305775937	803	380792	362866
Hawaii	33	39649550	63	629358	29912829	63	474807	30794530	76	405191	31818816	85	374339	37435611	88	425405	42779098	85	503284	34504057	71	485973	28731087	60	478851	30287462	66	458901	22626711	54	419013	465512
Idaho	51	2959419	11	269038	4106007	17	241530	3340504	15	222700	3677751	14	262696	2619751	10	261975	4198350	25	167934	4199651	17	247038	3467252	12	288938	4053237	13	311787	3335353	13	256566	253020
Illinois	23	502971400	1539	326817	538186467	1576	341489	537974787	1563	344194	552263795	1584	348651	545375587	1566	348260	675607001	1950	346465	649799334	1709	380222	555679208	1426	389677	572911460	1454	394024	537965232	1407	382349	360215
Indiana	32	155021282	496	312543	166027820	507	327471	166581087	520	320348	169672800	520	326294	162239791	502	323187	206122173	646	319075	205548565	627	327829	171479999	538	318736	164192065	512	320688	149669484	482	310518	320669
Iowa	18	150611549	406	370964	142815512	393	363398	145350061	389	373651	147270825	397	370959	153228769	378	405367	185641756	475	390825	185262873	422	439012	151075662	359	420824	150742053	373	404134	129428808	353	366654	390579
Kansas	36	45745934	162	282382	46855288	165	283971	50772048	186	272968	55944587	209	267677	60970841	210	290337	73142866	258	283499	77124496	246	313514	64788864	207	312990	60808204	198	307112	54793144	170	322313	293676
Kentucky	30	106239698	371	286360	114595621	373	307227	113540812	369	307699	113274400	384	294985	117360153	375	312960	154825515	504	307193	136242745	420	324387	115445893	358	322475	116451347	342	340501	106741258	324	329448	313324
Louisiana	38	92718247	319	290653	102693504	316	324979	97739480	363	269255	85752641	276	310698	80730241	254	317836	89819560	324	277221	92598803	292	317119	83485613	247	337998	86111134	250	344445	80310866	236	340300	313050
Maine	31	41698754	101	412859	37599978	100	376000	37835663	98	386078	34846045	95	366800	30797700	89	346042	41763472	120	348029	39507739	106	372715	32208429	88	366005	32659358	82	398285	26876763	74	363200	373601
Maryland	3	764350838	1805	423463	768610105	1764	435720	753314047	1730	435442	727897901	1773	410546	736491102	1679	438649	916764886	2061	444816	901269597	1871	481705	792144731	1608	492627	740318387	1595	464149	676385259	1537	440068	446718
Massachusetts	1	1612727014	4045	398696	1671413027	4017	416085	1678781245	3917	428589	1730201870	3945	438581	1721519558	3889	442664	2230062419	4907	454466	2276982705	4585	496616	1863402530	3826	487037	1895060689	3857	491330	1767657107	3722	474921	452898
Michigan	20	392976384	1174	334733	411698600	1192	345385	411845889	1183	348137	419646459	1171	358366	436821397	1221	357757	578631353	1567	369261	574895733	1465	392420	501548865	1238	405128	486728654	1262	385680	447722745	1175	381041	367791
Minnesota	12	306819030	864	355115	315019835	839	375471	319354386	856	373078	346830178	875	396377	347544323	862	403184	398847352	1033	386106	427680363	987	433313	359541017	842	427008	365875348	858	426428	370186822	833	444402	402048
Mississippi	46	20733156	63	329098	17930487	51	351578	21528649	59	364892	20426055	64	319157	19356030	60	322600	21702874	80	271286	23322974	69	338014	22026294	63	349624	22006185	59	372986	25531324	59	432734	345197
Missouri	15	333804297	979	340965	326806655	943	346561	315945966	896	352618	302109715	868	348053	321745514	887	362735	379978145	1113	341400	374162985	985	379861	301231477	828	363806	303705516	792	383467	273889431	765	358025	357749
Montana	39	17841467	68	262375	26137011	74	353203	17428972	71	245478	19725569	65	303470	20562501	67	306903	25308054	96	263626	22372633	69	324241	17326472	50	346529	13145836	44	298769	11632986	46	252891	295749
Nebraska	25	52414856	187	280293	55363308	185	299261	57800273	186	310754	53819433	184	292497	61544696	207	297317	81503972	268	304119	80328588	234	343285	60415359	179	337516	63836128	187	341370	59548481	178	334542	314095
Nevada	49	13770101	48	286877	12688169	44	288367	12999317	45	288874	12952359	42	308390	13397365	41	326765	15224739	55	276813	14281840	44	324587	12240598	40	306015	11443240	34	336566	11298903	36	313858	305711
New Hampshire	14	81767256	214	382090	82360671	210	392194	78395702	201	390028	76324732	200	381624	72183159	184	392300	90371418	236	382930	77183537	190	406229	66060907	164	402810	67486247	158	427128	66580419	169	393967	395130
New Jersey	34	204837755	586	349552	201896669	577	349908	188555977	572	329643	196298809	575	341389	186262258	531	350776	224255746	698	321283	221881490	617	359613	183483615	517	354901	178606504	563	317241	166045836	537	309210	338352
New Mexico	28	53213117	177	300639	53990955	187	288722	52927894	157	337120	64873647	183	354501	65620380	184	356632	80041159	215	372284	77211991	199	388000	56337105	162	347760	61527332	159	386964	54814437	148	370368	350299
New York	8	1496931713	4039	370619	1509126384	3915	385473	1463040582	3806	384404	1507538450	3855	391061	1462034144	3708	394292	1812689360	4586	395266	1836686883	4345	422713	1525689910	3651	417883	1576093416	3712	424594	1503284280	3638	413217	399952
North Carolina	9	636895531	1626	391695	681293114	1635	416693	694004142	1618	428927	696908699	1597	436386	697635901	1636	426428	876555871	2086	420209	843037245	1890	446051	742907311	1557	477140	765881142	1647	465016	717294354	1600	448309	435685
North Dakota	44	6729746	33	203932	7271187	33	220339	6374078	28	227646	7468927	26	287266	5591721	25	223669	7222853	33	218874	6514038	26	250540	6860111	22	311823	5647315	23	245535	5246347	19	276124	246575
Ohio	22	466882225	1444	323326	500554986	1473	339820	493924754	1456	339234	487493513	1443	337833	486509858	1397	348253	608304311	1827	332953	617917283	1601	385957	511974503	1339	382356	529533740	1365	387937	503566820	1299	387657	356533
Oklahoma	43	46562890	158	294702	47256152	156	302924	45843655	148	309754	51794824	165	313908	47991724	153	313671	71918387	206	349118	72849739	194	375514	60437185	167	361899	57689414	163	353923	55931882	153	365568	334098
Oregon	13	203555342	609	334245	221101346	630	350955	216674033	618	350605	212539002	592	359019	205575450	576	356902	244050746	687	355241	259084849	664	390188	232869598	596	390721	223139882	574	388745	204451565	520	393176	366980
Pennsylvania	7	989158656	2806	352516	1019719402	2769	368263	1004133550	2713	370119	1002267866	2707	370250	1015132324	2719	373348	1285924955	3402	377991	1272838163	3140	405362	1082759797	2594	417409	1074197605	2639	407047	984178446	2500	393671	383598
Puerto Rico	52	8403383	19	442283	8159225	20	407961	6754441	18	375247	5676013	9	630668	7564584	17	444976	9434767	23	410207	11366756	30	378892	9689648	22	440439	9082156	27	336376	9573764	27	354584	422163
Rhode Island	5	96543700	276	349796	97348348	266	365971	95883780	277	346151	105290430	289	364327	100543648	269	373768	131392837	343	383069	124236079	302	411378	114576495	276	415132	109812633	273	402244	102086266	265	385231	379707
South Carolina	37	80663226	289	279112	80751625	269	300192	77010638	256	300823	89662275	298	300880	93611519	303	308949	127776349	424	301359	115878657	373	310667	93764225	325	288505	91726834	295	310938	78282265	291	269011	297044
South Dakota	45	8258798	23	359078	8022556	22	364662	7673047	27	284187	6467529	21	307978	5911864	19	311151	8634285	34	253950	9039094	34	265856	6914558	18	384142	6748321	18	374907	6672158	18	370675	327658
Tennessee	16	280151897	836	335110	305417314	854	357632	299269661	832	359699	306260313	830	368988	305717278	831	367891	402700312	1043	386098	389060665	949	409969	325228161	804	404513	328020628	802	409003	312157168	821	380216	377912
Texas	27	786983375	2357	333892	788133183	2303	342220	762036636	2225	342488	769532043	2217	347105	768518174	2205	348534	943537206	2778	339646	938049168	2508	374023	743232685	2091	355444	750965968	2056	365256	681757212	1955	348725	349733
Utah	21	109415217	334	327590	112366884	342	328558	113123314	339	333697	111648232	331	337306	113734578	351	324030	149893427	441	339894	152987125	411	372231	130460224	356	366461	130067066	349	372685	123545569	353	349987	345244
Vermont	10	53947398	151	357268	51541700	140	368155	46254733	127	364210	48730128	131	371986	48756129	133	366587	52545144	146	359898	55727240	119	468296	37925207	97	390982	37618874	98	383866	36374081	86	422954	385420
Virginia	29	237558341	698	340341	229139937	638	359154	223022751	611	365013	225791145	657	343670	226403641	680	332947	298877944	829	360528	257984481	755	341701	219367662	585	374987	210516608	581	362335	207981341	578	359829	354051
Washington	6	542671760	1229	441556	571643156	1253	456220	623585945	1218	511975	594206293	1237	480361	585211008	1219	480075	750606977	1530	490593	802870573	1466	547661	653464170	1229	531704	658393912	1250	526715	594736477	1209	491924	495878
West Virginia	47	9527101	48	198481	10392592	44	236195	12850931	55	233653	15458195	67	230719	14340336	54	265562	18357913	73	251478	16031267	65	246635	12180666	47	259163	9871070	38	259765	10501308	33	318221	249987
Wisconsin	17	262133899	784	334354	270521253	765	353623	278281512	791	351810	283692929	778	364644	280678914	769	364992	336957759	947	355816	347877363	891	390435	283016688	738	383491	280202363	733	382268	272333359	715	380886	366232
Wyoming	48	3364493	15	224300	3401969	14	242998	2265703	11	205973	2595607	12	216301	3189884	14	227849	3756500	18	208694	2615974	13	201229	2043742	9	227082	2587544	11	235231	3680202	14	262872	225253

## Sheet: Funding Rate
State	Per Capita Funding Rank	2004	2005	2006	2007	2008	2009	2010	2011	2012	2013	mean
Alabama	24	0.305	0.227	0.212	0.255	0.258	0.243	0.247	0.212	0.198	0.15	0.2307
Alaska	50	0.25	0.263	0.048	0.133	0.158	0.125	0.353	0.12	0.167	0.095	0.1712
Arizona	35	0.232	0.213	0.24	0.23	0.198	0.153	0.211	0.212	0.155	0.153	0.1997		PCF Quartile	Average FR
Arkansas	42	0.234	0.192	0.176	0.206	0.212	0.24	0.255	0.093	0.107	0.171	0.1886		Q1	0.274823
California	11	0.347	0.313	0.293	0.3	0.306	0.3	0.295	0.275	0.268	0.264	0.2961		Q2	0.252031
Colorado	19	0.321	0.275	0.242	0.274	0.292	0.268	0.241	0.24	0.225	0.238	0.2616		Q3	0.213862
Connecticut	4	0.367	0.325	0.283	0.321	0.286	0.302	0.334	0.293	0.286	0.277	0.3074		Q4	0.152785
Delaware	40	0.236	0.186	0.185	0.197	0.103	0.118	0.163	0.145	0.111	0.101	0.1545
District Of Columbia	2	0.218	0.217	0.215	0.22	0.199	0.191	0.222	0.2	0.177	0.19	0.2049
Florida	41	0.214	0.266	0.208	0.203	0.226	0.185	0.201	0.174	0.186	0.166	0.2029
Georgia	26	0.283	0.227	0.235	0.274	0.28	0.251	0.239	0.198	0.19	0.203	0.238
Hawaii	33	0.19	0.178	0.151	0.377	0.222	0.143	0.11	0.151	0.124	0.09	0.1736
Idaho	51	0.08	0.304	0.133	0.063	0.07	0.18	0.16	0.079	0.1	0.083	0.1252
Illinois	23	0.273	0.284	0.255	0.284	0.257	0.271	0.23	0.237	0.225	0.233	0.2549
Indiana	32	0.296	0.27	0.237	0.277	0.215	0.24	0.22	0.212	0.19	0.172	0.2329
Iowa	18	0.252	0.233	0.225	0.251	0.274	0.229	0.198	0.181	0.241	0.192	0.2276
Kansas	36	0.18	0.201	0.204	0.262	0.189	0.199	0.21	0.18	0.209	0.158	0.1992
Kentucky	30	0.246	0.196	0.179	0.227	0.258	0.232	0.158	0.228	0.211	0.2	0.2135
Louisiana	38	0.227	0.169	0.149	0.188	0.187	0.152	0.173	0.169	0.165	0.143	0.1722
Maine	31	0.365	0.328	0.364	0.253	0.221	0.258	0.329	0.214	0.19	0.21	0.2732
Maryland	3	0.323	0.296	0.25	0.286	0.281	0.264	0.282	0.26	0.246	0.233	0.2721
Massachusetts	1	0.351	0.339	0.293	0.326	0.307	0.313	0.333	0.284	0.281	0.265	0.3092
Michigan	20	0.277	0.258	0.245	0.249	0.269	0.25	0.252	0.22	0.217	0.219	0.2456
Minnesota	12	0.33	0.281	0.305	0.294	0.283	0.261	0.288	0.247	0.265	0.235	0.2789
Mississippi	46	0.289	0.09	0.143	0.165	0.178	0.11	0.125	0.149	0.119	0.13	0.1498
Missouri	15	0.33	0.292	0.261	0.26	0.311	0.274	0.264	0.242	0.27	0.243	0.2747
Montana	39	0.197	0.3	0.19	0.277	0.235	0.273	0.232	0.165	0.16	0.193	0.2222
Nebraska	25	0.243	0.233	0.238	0.198	0.261	0.215	0.203	0.105	0.171	0.152	0.2019
Nevada	49	0.196	0.191	0.188	0.141	0.152	0.133	0.136	0.123	0.2	0.169	0.1629
New Hampshire	14	0.383	0.264	0.246	0.367	0.294	0.312	0.167	0.216	0.289	0.259	0.2797
New Jersey	34	0.255	0.228	0.233	0.237	0.269	0.24	0.199	0.179	0.22	0.207	0.2267
New Mexico	28	0.306	0.24	0.2	0.238	0.225	0.192	0.251	0.187	0.208	0.141	0.2188
New York	8	0.312	0.282	0.261	0.288	0.279	0.269	0.271	0.254	0.257	0.24	0.2713
North Carolina	9	0.297	0.291	0.285	0.274	0.289	0.279	0.281	0.227	0.282	0.242	0.2747
North Dakota	44	0.182	0.109	0.147	0.14	0.167	0.114	0.115	0.138	0.175	0.1	0.1387
Ohio	22	0.273	0.279	0.231	0.23	0.247	0.231	0.241	0.216	0.211	0.21	0.2369
Oklahoma	43	0.19	0.18	0.212	0.146	0.168	0.201	0.221	0.207	0.168	0.149	0.1842
Oregon	13	0.328	0.283	0.244	0.286	0.281	0.285	0.322	0.251	0.233	0.266	0.2779
Pennsylvania	7	0.332	0.285	0.275	0.292	0.302	0.286	0.271	0.24	0.248	0.241	0.2772
Puerto Rico	52	0.056	0.133	0.098	0.068	0.075	0.107	0.108	0.101	0.072	0.089	0.0907
Rhode Island	5	0.325	0.28	0.22	0.277	0.225	0.243	0.217	0.206	0.228	0.21	0.2431
South Carolina	37	0.272	0.167	0.158	0.27	0.221	0.183	0.196	0.16	0.181	0.141	0.1949
South Dakota	45	0.282	0.115	0.205	0.147	0.136	0.109	0.13	0.125	0.158	0.098	0.1505
Tennessee	16	0.318	0.298	0.264	0.29	0.278	0.261	0.291	0.238	0.245	0.22	0.2703
Texas	27	0.282	0.263	0.229	0.242	0.253	0.226	0.21	0.18	0.193	0.183	0.2261
Utah	21	0.323	0.325	0.276	0.273	0.3	0.262	0.256	0.238	0.247	0.222	0.2722
Vermont	10	0.326	0.303	0.23	0.26	0.385	0.186	0.267	0.13	0.208	0.223	0.2518
Virginia	29	0.257	0.224	0.224	0.252	0.283	0.231	0.225	0.199	0.202	0.175	0.2272
Washington	6	0.367	0.311	0.328	0.303	0.305	0.315	0.328	0.282	0.29	0.252	0.3081
West Virginia	47	0.154	0.08	0.165	0.202	0.101	0.149	0.152	0.057	0.072	0.092	0.1224
Wisconsin	17	0.323	0.311	0.289	0.302	0.295	0.255	0.272	0.249	0.252	0.275	0.2823
Wyoming	48	0.25	0.038	0.107	0.182	0.176	0.091	0.111	0.105	0.25	0.136	0.1446

## Sheet: Success Rate
State	Per Capita Funding Rank	2004	2005	2006	2007	2008	2009	2010	2011	2012	2013	mean
Alabama	24	0.236	0.181	0.165	0.194	0.202	0.177	0.2	0.168	0.159	0.112	0.1794
Alaska	50	0.214	0.217	0.042	0.118	0.2	0.077	0.133	0.083	0.136	0.13	0.135
Arizona	35	0.179	0.173	0.187	0.187	0.162	0.131	0.161	0.159	0.122	0.116	0.1577		PCF Quartile	Average SR
Arkansas	42	0.193	0.152	0.131	0.159	0.166	0.182	0.191	0.086	0.084	0.115	0.1459		Q1	0.215962
California	11	0.279	0.246	0.226	0.232	0.237	0.234	0.234	0.202	0.194	0.193	0.2277		Q2	0.201454
Colorado	19	0.262	0.224	0.197	0.216	0.244	0.219	0.192	0.176	0.181	0.189	0.21		Q3	0.171892
Connecticut	4	0.297	0.259	0.22	0.246	0.235	0.237	0.253	0.22	0.215	0.195	0.2377		Q4	0.124831
Delaware	40	0.188	0.141	0.148	0.161	0.091	0.1	0.153	0.105	0.122	0.105	0.1314
District Of Columbia	2	0.173	0.173	0.168	0.164	0.14	0.143	0.173	0.143	0.128	0.128	0.1533
Florida	41	0.168	0.2	0.152	0.157	0.174	0.152	0.148	0.131	0.134	0.123	0.1539
Georgia	26	0.233	0.179	0.181	0.205	0.203	0.182	0.18	0.155	0.152	0.134	0.1804
Hawaii	33	0.184	0.156	0.125	0.349	0.239	0.127	0.092	0.146	0.109	0.066	0.1593
Idaho	51	0.069	0.241	0.129	0.057	0.075	0.167	0.163	0.023	0.098	0.081	0.1103
Illinois	23	0.228	0.23	0.203	0.22	0.209	0.207	0.188	0.183	0.167	0.177	0.2012
Indiana	32	0.244	0.207	0.186	0.218	0.171	0.175	0.176	0.166	0.15	0.129	0.1822
Iowa	18	0.22	0.181	0.184	0.201	0.216	0.193	0.168	0.143	0.183	0.16	0.1849
Kansas	36	0.159	0.177	0.167	0.211	0.147	0.155	0.18	0.136	0.153	0.11	0.1595
Kentucky	30	0.184	0.154	0.137	0.171	0.203	0.179	0.128	0.152	0.145	0.132	0.1585
Louisiana	38	0.17	0.135	0.116	0.148	0.139	0.123	0.15	0.126	0.125	0.096	0.1328
Maine	31	0.321	0.291	0.309	0.21	0.2	0.267	0.263	0.198	0.14	0.213	0.2412
Maryland	3	0.27	0.246	0.198	0.225	0.219	0.215	0.214	0.197	0.189	0.182	0.2155
Massachusetts	1	0.281	0.274	0.228	0.252	0.245	0.243	0.257	0.208	0.207	0.197	0.2392
Michigan	20	0.231	0.218	0.202	0.195	0.217	0.206	0.198	0.176	0.167	0.16	0.197
Minnesota	12	0.279	0.224	0.248	0.238	0.245	0.208	0.235	0.184	0.209	0.19	0.226
Mississippi	46	0.253	0.088	0.118	0.134	0.147	0.096	0.122	0.129	0.099	0.097	0.1283
Missouri	15	0.277	0.245	0.21	0.201	0.248	0.22	0.203	0.18	0.212	0.179	0.2175
Montana	39	0.18	0.27	0.143	0.221	0.188	0.224	0.127	0.146	0.138	0.143	0.178
Nebraska	25	0.181	0.172	0.212	0.158	0.216	0.167	0.158	0.078	0.135	0.116	0.1593
Nevada	49	0.2	0.196	0.155	0.135	0.152	0.129	0.102	0.121	0.131	0.145	0.1466
New Hampshire	14	0.331	0.234	0.199	0.307	0.25	0.254	0.151	0.181	0.23	0.214	0.2351
New Jersey	34	0.205	0.177	0.173	0.186	0.21	0.194	0.164	0.141	0.171	0.157	0.1778
New Mexico	28	0.251	0.202	0.168	0.195	0.193	0.144	0.202	0.131	0.164	0.134	0.1784
New York	8	0.258	0.225	0.207	0.229	0.224	0.212	0.216	0.198	0.193	0.184	0.2146
North Carolina	9	0.248	0.231	0.224	0.203	0.235	0.231	0.234	0.176	0.211	0.19	0.2183
North Dakota	44	0.145	0.078	0.095	0.088	0.132	0.086	0.081	0.117	0.102	0.08	0.1004
Ohio	22	0.22	0.226	0.18	0.175	0.202	0.188	0.184	0.168	0.151	0.156	0.185
Oklahoma	43	0.131	0.156	0.147	0.121	0.136	0.171	0.188	0.153	0.129	0.112	0.1444
Oregon	13	0.274	0.239	0.197	0.239	0.244	0.225	0.262	0.203	0.189	0.207	0.2279
Pennsylvania	7	0.261	0.226	0.214	0.226	0.237	0.221	0.211	0.177	0.181	0.178	0.2132
Puerto Rico	52	0.053	0.121	0.091	0.064	0.067	0.088	0.092	0.083	0.028	0.095	0.0782
Rhode Island	5	0.26	0.225	0.176	0.207	0.184	0.199	0.176	0.163	0.15	0.138	0.1878
South Carolina	37	0.217	0.193	0.119	0.207	0.172	0.154	0.154	0.114	0.134	0.109	0.1573
South Dakota	45	0.234	0.091	0.157	0.128	0.109	0.082	0.1	0.074	0.097	0.072	0.1144
Tennessee	16	0.248	0.234	0.214	0.224	0.218	0.211	0.236	0.181	0.184	0.18	0.213
Texas	27	0.229	0.207	0.17	0.186	0.197	0.178	0.167	0.14	0.139	0.134	0.1747
Utah	21	0.285	0.281	0.229	0.22	0.243	0.222	0.219	0.193	0.191	0.186	0.2269
Vermont	10	0.328	0.256	0.181	0.194	0.306	0.159	0.201	0.096	0.164	0.143	0.2028
Virginia	29	0.218	0.183	0.175	0.196	0.229	0.189	0.17	0.138	0.142	0.132	0.1772
Washington	6	0.306	0.265	0.259	0.246	0.238	0.24	0.26	0.214	0.216	0.191	0.2435
West Virginia	47	0.125	0.066	0.15	0.165	0.076	0.158	0.109	0.048	0.066	0.07	0.1033
Wisconsin	17	0.26	0.258	0.228	0.245	0.246	0.213	0.232	0.207	0.202	0.201	0.2292
Wyoming	48	0.222	0.032	0.086	0.2	0.15	0.083	0.103	0.08	0.212	0.139	0.1307

## Sheet: Productivity
State	Per Capita Funding Rank	Publications	Funding	Publications Per Dollar	Productivity Index
Alabama	24	2206	154450778	1.42829e-05	14.2829
Alaska	50	23	3364775	6.83552e-06	6.83552
Arizona	35	1772	129044210	1.37317e-05	13.7317		PCF Quartile	Average Prod.
Arkansas	42	487	42910960	1.13491e-05	11.3491		Q1	12.0419
California	11	30346	2469682407	1.22874e-05	12.2874		Q2	14.1696
Colorado	19	3062	221190231	1.38433e-05	13.8433		Q3	13.5609
Connecticut	4	4408	368404827	1.19651e-05	11.9651		Q4	13.7564
Delaware	40	231	16784381	1.37628e-05	13.7628
District Of Columbia	2	1098	105437984	1.04137e-05	10.4137
Florida	41	4659	385641547	1.20812e-05	12.0812
Georgia	26	4199	331488309	1.26671e-05	12.6671
Hawaii	33	369	28108113	1.31279e-05	13.1279
Idaho	51	55	3582252	1.53535e-05	15.3535
Illinois	23	8246	549299575	1.50118e-05	15.0118
Indiana	32	3026	173872817	1.74035e-05	17.4035
Iowa	18	2019	147719213	1.36678e-05	13.6678
Kansas	36	1013	62750344	1.61433e-05	16.1433
Kentucky	30	1667	114454937	1.45647e-05	14.5647
Louisiana	38	1206	83641943	1.44186e-05	14.4186
Maine	31	359	32006210	1.12166e-05	11.2166
Maryland	3	8440	773914263	1.09056e-05	10.9056
Massachusetts	1	21341	1851725775	1.15249e-05	11.5249
Michigan	20	6925	495145510	1.39858e-05	13.9858
Minnesota	12	5589	351858736	1.58842e-05	15.8842
Mississippi	46	431	19092862	2.25739e-05	22.5739
Missouri	15	4670	299604984	1.55872e-05	15.5872
Montana	39	150	17244186	8.69858e-06	8.69858
Nebraska	25	973	59521389	1.63471e-05	16.3471
Nevada	49	143	12239176	1.16838e-05	11.6838
New Hampshire	14	918	64799667	1.41667e-05	14.1667
New Jersey	34	2397	182073561	1.3165e-05	13.165
New Mexico	28	650	55352399	1.17429e-05	11.7429
New York	8	18415	1510374490	1.21923e-05	12.1923
North Carolina	9	8650	728504241	1.18736e-05	11.8736
North Dakota	44	118	7759353	1.52075e-05	15.2075
Ohio	22	6357	512000967	1.2416e-05	12.416
Oklahoma	43	822	61079883	1.34578e-05	13.4578
Oregon	13	2562	227429099	1.1265e-05	11.265
Pennsylvania	7	13513	1059059853	1.27594e-05	12.7594
Puerto Rico	52	73	9341508	7.81458e-06	7.81458
Rhode Island	5	1202	112043039	1.07e-05	10.7
South Carolina	37	1291	90297778	1.42971e-05	14.2971
South Dakota	45	174	6961809	2.49935e-05	24.9935
Tennessee	16	4901	320425345	1.52953e-05	15.2953
Texas	27	10646	735482184	1.44749e-05	14.4749
Utah	21	1654	126394643	1.3086e-05	13.086
Vermont	10	570	37934643	1.50258e-05	15.0258
Virginia	29	2887	216965253	1.33063e-05	13.3063
Washington	6	6294	645719169	9.74727e-06	9.74727
West Virginia	47	186	11351467	1.63855e-05	16.3855
Wisconsin	17	3896	281336761	1.38482e-05	13.8482
Wyoming	48	14	1908742	7.33467e-06	7.33467
